1 **Analysis of the gut and gill microbiome of resistant and susceptible lines of rainbow**  
2 **trout (*Oncorhynchus mykiss*)**

3

4 **Ryan M. Brown<sup>1</sup>, Gregory D. Wiens<sup>2</sup>, Irene Salinas<sup>1</sup>**

5

6 **<sup>1</sup> University of New Mexico, Department of Biology, Center for Evolutionary and**  
7 **Theoretical Immunology (CETI), Albuquerque, New Mexico, USA**

8 **<sup>2</sup> National Center for Cool and Cold Water Aquaculture, Agriculture Research**  
9 **Service, United States Department of Agriculture Kearneysville, West Virginia,**

10 **USA**

11

12

13

14

15

16

17

18

19

20

21

22

23

24 **Abstract**

25 Commensal microorganisms present at mucosal surfaces play a vital role in protecting the  
26 host organism from bacterial infection. There are multiple factors that contribute to  
27 selecting for the microbiome, key of which are host genetics. *Flavobacterium*  
28 *psychrophillum*, the causative agent of Bacterial Cold Water Disease in salmonids,  
29 accounts for acute losses in wild and farmed Rainbow Trout (*Oncorhynchus mykiss*). The  
30 U.S. National Center for Cool and Cold Water Aquaculture has used family-based  
31 selective breeding to generate a line of rainbow trout with enhanced resistance to *F.*  
32 *psychrophilum*. The goal of this study is to determine whether selective breeding impacts  
33 the gut and gill microbiome of the *F. psychrophilum*-resistant as compared to a  
34 background matched susceptible trout line. Mid-gut and gill samples were collected from  
35 juvenile fish (mean bwt 118g) and microbial diversity assessed by 16S rDNA amplicon  
36 sequencing. Results indicate that alpha diversity was significantly higher in the mid-gut  
37 of the susceptible line compared to the resistant line, while no significant differences in  
38 alpha diversity were observed in the gills. *Mycoplasma sp.* was the dominant taxon in the  
39 mid-gut of both groups, although it was present at lower abundance in the susceptible  
40 line. We also observed an increased abundance of taxa that could potentially be  
41 pathogenic in the susceptible line, including *Brevinema sp.* and Enterobacteriaceae  
42 members. Within the gills, both lines exhibited similar microbial profiles, with  
43 *Candidatus Branchiomonas* being the dominant taxon. Together, these results suggest  
44 that selectively bred *Flavobacterium psychrophillum*-resistant trout may harness a more  
45 resilient gut microbiome, attributing to the disease resistant phenotype, providing a  
46 framework for future experiments.

47

48 **Introduction**

49 The microbiome has well established roles in pathogen exclusion and host immunity,  
50 including systemic and mucosal innate and adaptive immune responses and development  
51 of the immune system (1–3). There is strong evidence to support a role of host genetics in  
52 the selection of the gut microbiome in humans and other mammals (4–6), although this  
53 has not been well characterized in fish. The host microbial composition is also shaped by  
54 other factors including environment, diet, and disease (7–10). To begin to disentangle the  
55 contribution of host genetics and environmental factors shaping the fish microbiome, here  
56 we utilize a rainbow trout model in which two genetic lines of rainbow trout have been  
57 established by selective breeding that differ in susceptibility to a common environmental  
58 gram negative pathogen, *Flavobacterium psychrophilum*.

59 *Flavobacterium psychrophilum* is the causative agent of Bacterial Cold Water Disease  
60 (BCWD), which is a major concern in the United States aquaculture industry affecting a  
61 range of cold-water fish species, including the commercially relevant rainbow trout  
62 (*Oncorhynchus mykiss*). *F. psychrophillum* is a mucosal pathogen that typically infects  
63 the skin and gills of fish (11). Symptoms of BCWD in developed fish include necrosis of  
64 the caudal region, skin lesions, eroded fin tips, and loss of appetite. *F. psychrophilum* has  
65 a more pronounced effect on young fry, a condition referred to as rainbow trout fry  
66 syndrome. Rainbow trout fry syndrome is responsible for acute losses in trout farms  
67 worldwide, as the associated mortality rate is reported to be greater than 50% (12).  
68 BCWD is becoming an increasingly difficult disease to treat, as *F. psychrophilum* strains

69 have developed resistance to several commonly used antibiotics (13–15), and there is  
70 currently no commercially available licensed vaccine.

71 The National Center for Cool and Cold Water Aquaculture (NCCCWA) utilized family-  
72 based selective breeding to develop two distinctive genetic lines of rainbow trout that  
73 confer enhanced resistance (ARS-Fp-R), or susceptibility (ARS-Fp-S) to the pathogen *F.*  
74 *psychrophilum* (16). Enhanced resistance to *F. psychrophilum*-induced mortality in the  
75 ARS-Fp-R line has been described, both in the laboratory setting and on trout farms  
76 (17,18). Previous studies have investigated possible host mechanisms that attribute to  
77 enhanced resistance. For instance, a strong correlation between resistance to *F.*  
78 *psychrophilum* and increased spleen size has been described, although this relation does  
79 not appear to translate to other common fish pathogens, such as *Yersinia ruckeri* (19).  
80 Additionally, whole-body transcriptome analysis has identified numerous acute phase  
81 proteins and inflammatory cytokines that are differentially expressed in each line  
82 following challenge with *F. psychrophilum* (20). Further work is needed to better  
83 characterize the mechanism(s) by which enhanced resistance is achieved in the ARS-Fp-  
84 R line.

85 In this paper, we investigate the hypothesis that the higher innate disease resistance of the  
86 ARS-Fp-R line is due to differences in the microbial composition at host mucosal  
87 surfaces. Using 16S rDNA amplicon sequencing, we determine and compare the mid-gut  
88 and gill microbiomes of rainbow trout lines selectively bred for *F. psychrophilum*  
89 resistance and susceptibility.

90

## 91 **Materials and Methods**

## 92 **Animals and sampling**

93 The Institutional Animal Care and Use Committee (Leetown, WV) reviewed and  
94 approved all animal husbandry practices and disease challenge protocols per standards set  
95 forth in the USDA, ARS Policies and Procedures 130.4.v.3 titled 'Institutional Animal  
96 Care and Use 84 Committee'. Fish used in these experiments were from the 2017 Year  
97 Class and maintained as specific pathogen free as determined by biannual testing as  
98 previously described (17). A total of 33 single sire-dam matings contributed to the pool  
99 of ARS-Fp-R line fish and 31 matings contributed to the pool of ARS-Fp-S line. The  
100 disease resistant phenotype of each genetic line was evaluated at two time-points, 75 and  
101 276 days post-hatch. Fish were challenged with *F. psychrophilum* strain CSF259-93 and  
102 survival recorded over 21 days as previously described (19). Mean fish body weight at  
103 the first evaluation was 1.9 g and a total of 120 ARS-Fp-R and 119 ARS-Fp-S fish (n=3  
104 tanks per line) were challenged by intraperitoneal injection with a dose of 1.4E+07 CFU  
105 g<sup>-1</sup> in a total volume of 50 µL using a 26g needle fitted onto an Eppendorf repeating  
106 pipette. Mean body weight at the second evaluation was 194 g and a total of 70 ARS-Fp-  
107 R and 70 ARS-Fp-S fish (n=2 tanks per line) were challenged by intramuscular injection  
108 with a dose of 3.5E+06 CFU g<sup>-1</sup> body weight in a total volume of 50 µL using a 26g  
109 needle fitted onto an Eppendorf repeating pipette. The fish utilized in the second  
110 experiment were part of a larger study evaluating experimental vaccination and these fish  
111 had been sham vaccinated with PBS 35 days prior to challenge. In both challenges, *F.*  
112 *psychrophilum* was isolated from mortalities and confirmed by PCR genotyping.  
113 At the time of microbiome sampling, fish were reared under two different tank conditions  
114 as described in Supplemental data file 1. Ten fish from each tank system per genetic line

115 were euthanized using 200 mg L<sup>-1</sup> MS222 for 5 minutes. Each fish was photographed,  
116 weighted, gill tissue sampled, intestinal mid-gut sampled, and spleen weighed within 30  
117 minutes of euthanasia. Sample were placed in SLB (21) on ice and then moved to  
118 storage at -80° C. Instruments were cleaned between each fish and gloves changed  
119 between tank groups. Three control tubes containing SLB alone were included as  
120 negative controls.

### 121 **DNA Extraction, 16S rDNA PCR Amplification, and Sequencing**

122 Whole genomic DNA was extracted from skin and gill samples by first lysing tissue  
123 samples using sterile 3 mm tungsten beads (Qiagen) and Qiagen TissueLyser II. Next,  
124 using the cetyltrimethylammonium bromide method as previously described (21), DNA  
125 was isolated and suspended in 50 µL RNase and DNase free molecular biology grade  
126 water. DNA concentration and purity was then assessed using a Nanodrop ND 1000  
127 (Thermo Scientific).

128 Bacterial DNA was then replicated by PCR using Illumina adapter fused primers  
129 targeting the V1-V3 region of the prokaryotic 16S rDNA gene. The primer sequences  
130 were as follows: 28F 5'-GAGTTTGATCNTGGCTCAG-3' and 519R  
131 5'GTNTTACNGCGGCKGCTG-3' (where N = any nucleotide, and K = T or G). DNA  
132 samples were diluted 1:10 or 1:100, and Quantabio 5PRIME HotMasterMix was used.  
133 16S amplicons were generated using the following conditions: 94° C for 90s; 33 cycles of  
134 94° C for 30s, 52° C for 30s, 72° C for 90s; and a final extension of 72° C for 7 min A  
135 positive control of a verified 16S V1-V3 amplicon, and a negative control of molecular  
136 biology grade water was included in every PCR reaction. In addition, we included a mock  
137 community positive control with each sequencing run, which consisted of equal DNA

138 amounts of 7 different bacterial isolates previously cloned and a negative control that  
139 consisted of SLB handled in the same way as the rest of the tubes during sampling to  
140 which no tissue was added. Amplicons were purified using the Axygen AxyPrep Mag  
141 PCR Clean-up Kit (Thermo Scientific), and eluted into 30  $\mu$ L molecular biology grade  
142 water. Unique oligonucleotide barcodes were ligated to the 5' and 3' ends of each sample,  
143 as well as the Nextera adaptor sequences, using the Nextera XT Index Kit v2 set A  
144 (Illumina). DNA concentrations were quantified using a Qubit, and normalized to a  
145 concentration of 200 ng/ $\mu$ L for DNA library pooling. Pooled samples were cleaned once  
146 more using the Axygen PCR clean-up kit before being sent off for sequencing.  
147 Sequencing was performed on the Illumina Miseq platform using the MiSeq Reagent Kit  
148 v3 (600 cycle) at the Clinical and Translational Sciences Center at the University of New  
149 Mexico Health Sciences Center.

#### 150 **Data Analysis and Statistics**

151 Differences in survival between genetic lines were determined using the product limit  
152 method of Kaplan and Meier and calculations were performed using GraphPad v4.0  
153 software. Log-rank (Mantel-Cox) test was used to compare survival curves. Initial  
154 sequence data was analyzed using the latest version of Quantitative Insights Into  
155 Microbial Ecology 2 (Qiime2 v2018.6) (22). Demultiplexed sequence reads were quality  
156 filtered using DADA2 (23). Samples were then rarefied to a sampling depth of 12,603  
157 sequences per sample for mid-gut reads, and 2020 sequences per sample for gill reads.  
158 Amplicon sequence variants (ASVs) were picked by aligning to the latest SILVA 16S  
159 database (version 132). Core diversity metrics were analyzed, including number of ASVs  
160 and Shannon's diversity index for alpha diversity, and PERMANOVA for beta diversity.

161 Nonmetric multidimensional scaling and generation of heat maps were performed in  
162 RStudio (24) using the phyloseq package (25). Random forest modeling was performed  
163 in Qiime2. Differential abundance testing was performed in Qiime2 using ANCOM (26),  
164 as well as in RStudio using the DESeq2 package (27). For all statistical analyses, fish  
165 were split into groups based on 'Treatment' (ARS-Fp-R, ARS-Fp-S) or 'Tank Treatment'.

#### 166 **Data Availability**

167 Sequencing data was deposited in NCBI BioProject # PRJNA488363.

#### 168 **Results**

##### 169 **Phenotype Confirmation of Disease Resistance/Susceptibility**

170 The relative phenotype of the two genetic lines was evaluated at time-points either before  
171 or after microbiome sampling. At both time points, the survival of the ARS-Fp-R genetic  
172 line was significantly higher ( $P<0.001$ ) than the ARS-Fp-S line and consistent with  
173 estimated mid-point breeding values. In the first evaluation, a total of 3/120 (3%) ARS-  
174 Fp-R line fish died compared to 82/119 (69%) ARS-Fp-S line fish. In the second  
175 evaluation, 2/70 (3%) ARS-Fp-R fish died, while 58/70 (83%) ARS-Fp-S line fish died  
176 within the 21-day challenge period.

##### 177 **High throughput sequencing analysis**

178 A total number of 3,598,038 raw reads were obtained from all mid-gut samples. After  
179 merging paired ends, quality filtering, and removal of chimeric reads with DADA2, as  
180 well as filtering out non-specific trout genomic reads, a total of 1,413,104 reads  
181 remained, with a mean of 35,328 reads per sample. Samples were rarefied to a sample  
182 depth of 12,031, which excluded two ARS-Fp-R samples and two ARS-Fp-S samples.  
183 The sample size after rarefaction was  $n=18$  for both the ARS-Fp-R and ARS-Fp-S lines.



184 Gill sample sequencing produced a total of 4,646,971 raw reads. Quality filtering in  
185 DADA2 and removal of non-specific reads retained 333,281 reads, with a mean of  
186 13,331 reads per sample. Samples were rarefied to 2010 reads. The sample size after  
187 rarefaction was n=11 for ARS-Fp-R and n=14 for ARS-Fp-S.

### 188 **Resistant and susceptible lines display significant differences in alpha diversity in** 189 **the mid-gut, but not the gills**

190 Comparison of alpha diversity metrics obtained from the mid-gut showed significantly  
191 lower measures of gut microbial community richness (Observed ASVs), as well as  
192 Shannon's diversity index in the ARS-Fp-R line compared to the ARS-Fp-S line (Fig 1A  
193 and 1B). There was a total of 15 ASVs in the mid-gut of the resistant line, and 29 in the  
194 mid-gut of the susceptible line. In the gills, there were no significant differences in alpha  
195 diversity between lines with a total of 57 ASVs found in the gills of the resistant line, and  
196 50 in the susceptible line (Fig 1C and 1D).

### 197 **Fig 1. Comparison of alpha diversity metrics for the mid-gut and gill microbiome of ARS-Fp-R and** 198 **ARS-Fp-S trout.**

199 (A) Total number of observed ASVs in the mid-gut. (B) Shannon's diversity index in the mid-gut. (C) Total  
200 number of observed ASVs in the gills. (D) Shannon's diversity index in the gills. \*\* indicates statistically  
201 significant differences  $p < 0.01$ .

### 202 **Beta diversity analysis suggests possible tank effect on the gut microbiome**

203 We assessed the microbial diversity between different treatments, as well as between  
204 tanks by performing Nonmetric Multidimensional Scaling (NMDS) using the Bray Curtis  
205 distance metric. This ordination showed a discrete grouping of the two tanks containing  
206 the ARS-Fp-S line, while the two tanks containing the ARS-Fp-R line were more tightly  
207 clustered (Fig 2A). PERMANOVA analysis (28) identified "Treatment" (P value = 0.02)

208 and “Tank” (P value = 0.048 for ARS-Fp-R, P value = 0.001 for ARS-Fp-S) as  
209 significant determinants of the mid-gut microbial community composition. In the gills,  
210 NMDS ordination showed a similar pattern to that found in the gut, where fish from tank  
211 26 of the susceptible line clustered tightly together while fish from tank 12 showed  
212 greater variability. Meanwhile, there was no clear separation between individuals held in  
213 separate tanks of the resistant line (Fig 2B). PERMANOVA identified only tank housing  
214 within the ARS-Fp-S line (P value = 0.004) as a significant factor in determining gill  
215 microbial communities.

216 **Fig 2. NMDS ordination plots.**

217 NMDS ordination performed using Bray Curtis distance matrix of the (A) mid-gut and (B) gill microbiome  
218 of ARS-Fp-R and ARS-Fp-S trout.

219 **Gut microbial community composition**

220 A total of eight different phyla were identified in the mid-gut across both lines, although  
221 only four of these were represented over 1%, including Tenericutes, Spirochaetes,  
222 Proteobacteria, and Firmicutes. Tenericutes composed the vast majority of the mid-gut  
223 microbiome of both lines, constituting 81% of the total microbial diversity in the  
224 susceptible line and 89% in the resistant line (Fig 3A).

225 At the genus level, all Tenericutes reads were identified as *Mycoplasma sp.* Additionally,  
226 the genus *Brevinema sp.* was also abundant and showed greater abundance in the ARS-  
227 Fp-S (8.5%) compared to the ARS-Fp-R line (4.8%). Similarly, members of the family  
228 Enterobacteriaceae had greater abundance in the ARS-Fp-S line than the ARS-Fp-R line  
229 (2.2% and 0%, respectively); however, these differences were not significant. Differential  
230 abundance testing with ANCOM revealed three genera that were differentially abundant  
231 in the mid-gut of both trout lines; including *Hydrotalea sp.*, *Paenibacillus sp.*, and

232 *Variovorax sp.* This was replicated by differential abundance testing using DESeq2, an R  
233 package originally developed for differential expression analysis in RNA-seq data also  
234 used in microbiome studies (29,30).

235 The relative distribution of ASVs at the genus level was notably different between tanks  
236 of the same line (Fig 3B). Potential opportunistic taxa such as *Brevinema sp.* and  
237 Ambiguous Enterobacteriaceae were present in tanks 11 and 12, but were not identified  
238 in either tank 25 or 26. This trend is further shown in a heatmap representing the top 25  
239 ASVs observed in each sample (Fig 4). Two of the tanks that were in close proximity to  
240 one another displayed similar microbial profiles, despite holding different lines. This was  
241 not the case for tanks 25 and 26, as tank 26 displayed a microbial profile different from  
242 all other tanks since it contained ASVs representative of Enterobacteriaceae, *Hydrotalea*  
243 *sp.*, *Paenibacillus sp.*, and *Variovorax sp.*

244 **Fig 3. Relative microbial composition in the gut of each line.**

245 (A) Relative abundance of ASVs at the phylum level for each line. (B) Relative abundance of ASVs for  
246 each tank the two lines were divided into.

247 **Fig 4. Heatmap representing the top 25 ASVs present in the mid-gut of ARS-Fp-R and ARS-Fp-S**  
248 **trout.**

249 Each column represents one individual. Each row represents one ASV.

250 **Gill microbial community composition**

251 A total of nine different phyla were present in the trout gills across both lines. Five of  
252 these were represented at abundance greater than 1%, including Proteobacteria,  
253 Tenericutes, Spirochaetes, Bacteroidetes, and Firmicutes. Proteobacteria was the most  
254 abundant phylum in both groups, representing 85% of all bacterial diversity in the ARS-  
255 Fp-S line and 95% in the ARS-Fp-R line (Fig 5A). At the genus level, most

256 Proteobacteria reads were identified as *Candidatus Branchiomonas*. This taxon  
257 constituted 74% of all diversity in the gills of the susceptible line and 85% in the resistant  
258 line. We identified trace amounts of *Flavobacterium sp.* in both lines, as this taxon  
259 constituted 0.16 % of the ARS-Fp-S line and 1.1% of the ARS-Fp-R line. No ASVs were  
260 differentially abundant in the gill microbial community of both groups through ANCOM  
261 or DEseq2 analyses.

262 We observed discernable differences in the microbial community composition of fish of  
263 the same line housed in different tanks (Fig 5B). For example, *Candidatus*  
264 *Branchiomonas* was present at levels above 95% in tanks 25 (ARS-Fp-R) and 26 (ARS-  
265 Fp-S), whereas it constituted 71% of tank 11 (ARS-Fp-R) and 20% of tank 12 (ARS-Fp-  
266 S). The aforementioned potential opportunistic pathogens *Brevinema sp.* was only  
267 identified in tank 12. A heatmap of the top 30 ASVs in each sample (Fig 6) shows  
268 signatures of *Brevinema sp.* in fish from tank 12, as well as a reduced abundance of  
269 *Candidatus Branchiomonas* in this tank compared to all others.

270 **Fig 5. Microbial community composition of the gills of ARS-Fp-R and ARS-Fp-S trout.**

271 (A) Relative abundance of ASVs at the phylum level for each line. (B) Relative abundance of ASVs for  
272 tank the two lines were divided into.

273 **Fig 6. Heatmap representing the top 30 ASVs represented in the gill of ARS-Fp-R and ARS-Fp-S**  
274 **trout.**

275 Each column represents one individual fish. Each row represents one ASV.

## 276 **Random Forest Modeling**

277 Random forest modeling (31) was performed in order to see if a machine learning module  
278 could accurately predict treatment group as well as spleen index based on microbial  
279 community composition. In the mid-gut, this model was able to accurately predict 100%

280 of FPR samples, but only 50% of FPS samples (Fig 7). Table 1 shows features at the  
281 genus level that were rendered as being important in classifying treatment group. Due to  
282 the lower sampling size in the gills, we did not include random forest analyses of the gill  
283 samples. Finally, we also performed a random forest regressor to attempt to predict  
284 spleen index based on gut microbial composition, and found that there was no correlation  
285 between these two variables.

286 **Table 1: Features at the genus level that were identified by random forest modeling as being**  
287 **important in the classification of treatment group**

| <b>Feature</b>                | <b>Importance</b> |
|-------------------------------|-------------------|
| <i>Ralstonia</i>              | 0.194781898       |
| <i>Mycoplasma</i>             | 0.190003235       |
| <i>Variovorax</i>             | 0.129277426       |
| <i>Brevinema</i>              | 0.098010406       |
| <i>Paenibacillus</i>          | 0.093643145       |
| <i>Hydrotalea</i>             | 0.084976654       |
| Ambiguous Desulfovibrionaceae | 0.08063865        |
| <i>Streptococcus</i>          | 0.034762947       |
| <i>Staphylococcus</i>         | 0.027645825       |
| Ambiguous Gammaproteobacteria | 0.024251868       |
| <i>Shewanella</i>             | 0.023781255       |
| Ambiguous Ruminococcaceae     | 0.014827708       |
| <i>Exiguobacterium</i>        | 0.002446602       |
| Ambiguous Moraxellaceae       | 0.000952381       |

288

289 **Fig 7. Confusion matrix for random forest modeling in the gut.**

290 This heatmap represents how frequently samples within each line were correctly classified. The correct  
291 label is represented on the y-axis and the predicted label is represented on the x-axis, with the prediction  
292 frequency shown as a gradient.

293

## 294 **Discussion**

295 Commensal microbes have co-evolved with their eukaryotic counterparts, forming an  
296 intricate relationship that benefits both parties involved. Several studies have revealed  
297 that host genetics influences gut microbiota composition in a variety of species, including  
298 humans and rodents (4,5), chickens (32), and *Drosophila* (33). However, other factors  
299 such as host diet and environmental conditions are also deeply intertwined and clearly  
300 shape host microbial communities (7–9).

301 Teleost fish live in symbiosis with complex microbial communities that inhabit every  
302 mucosal barrier (gut, gills, skin and nose) (34). Fish microbial community composition is  
303 influenced by age (35), tissue site (36), diet (37–39), stress (40) and pathogen infection  
304 (41). However, few studies have investigated the impact host genetics has on shaping  
305 teleost microbiomes. A study on brook charr identified three quantitative trait loci  
306 associated with abundance of commensal strains in the skin (42). Another study in  
307 Atlantic salmon found significant differences in the skin and gut microbial composition  
308 amongst distinct wild populations that were not likely attributed to environmental  
309 conditions alone (43). These observations suggest that host genetics play an important  
310 role in teleost microbiome assembly, although more work is needed to better understand  
311 this relation.

312 Farmed fish are susceptible to many pathogens that threaten the sustainability of the  
313 finfish farming industry. Among the most prominent bacterial diseases, BCWD is  
314 particularly problematic in rainbow trout. The development of two genetic trout lines  
315 with different susceptibilities to BCWD agent, *F. psychrophilum*, offers an excellent  
316 platform to understand how host genetics may shape fish microbial communities. The  
317 current study suggests that host genetics influence the microbial community composition  
318 in the mid-gut, since the mid-gut bacterial community of the susceptible line was  
319 significantly more diverse than that of the resistant line. In agreement with previous  
320 studies, the mid-gut communities of both lines were dominated by *Mycoplasma sp.* This  
321 taxon appears to be highly abundant in the gastrointestinal microbiome of all salmonid  
322 species studied, including Atlantic salmon (44–46), rainbow trout (36,47) and Chinook  
323 salmon (48). Interestingly, we identified a lower abundance of *Mycoplasma sp.* in the  
324 susceptible line, suggesting that disease susceptibility may be associated with decreased  
325 *Mycoplasma sp.* levels in the gut. In support, a recent study investigated the intestinal  
326 microbiome of offshore farmed Chinook salmon (48), finding that abundance of potential  
327 pathogenic *Vibrio sp.* appeared to be inversely correlated with the presence of  
328 *Mycoplasma sp.* *Mycoplasma sp.* are characterized by their uniquely small genome and  
329 lack of a cell wall, which makes culture-based approaches to studying this bacterium  
330 difficult to achieve. Considering the widespread presence and abundance of *Mycoplasma*  
331 *sp.* in salmonid gastrointestinal tract across a wide range of geographical locations,  
332 including both lab-reared and wild-caught fish, it appears that strong evolutionary forces  
333 have enabled *Mycoplasma sp.* to thrive in this microenvironment. Future studies are

334 needed to determine the nature of this relationship and the ability of *Mycoplasma sp.* to  
335 prevent pathogen colonization in the gastrointestinal tract of salmonids.

336 Potential opportunistic pathogens were observed within the mid-gut of the ARS-Fp-S line  
337 at a greater abundance than in the ARS-Fp-R line. Expansions of opportunistic taxa have  
338 been previously described in other fish microbiome studies including in the skin of  
339 Atlantic salmon experimentally infected with salmonid alphavirus (37) and in Atlantic  
340 salmon experimentally infected with the parasite *Lepeophtheirus salmonis* (41).

341 Specifically, we found *Brevinema sp.* and ambiguous members of the family  
342 Enterobacteriaceae in the mid-gut of the susceptible trout line. *Brevinema sp.* was further  
343 identified as *Brevinema andersonii* at the species level in the SILVA database, which is a  
344 pathogenic taxon at least in rodents (49). However, upon sequence search using BLAST,  
345 it was most closely identified as an uncultured Spirochaeta sequence derived from an  
346 aquatic environment. Spirochaetes members have been described to cause disease in  
347 other marine species (50), and there are multiple well-studied members that are human  
348 pathogens (51). Deeper taxonomic characterization would be necessary to determine if  
349 this ASV is in fact a pathogen in rainbow trout. Meanwhile, Enterobacteriaceae reads  
350 were most closely identified as *Hafnia paralvei*, which is associated with infections in a  
351 variety of animals, including fish (52). Although the relative abundance of these taxa was  
352 small, these results suggest that ARS-Fp-R trout may possess a more resilient mid-gut  
353 microbiome, as compared to ARS-Fp-S. It is important to note that these fish were  
354 reared on spring water and sampled only at one timepoint. Additional studies are needed  
355 to examine whether these trends are observed in other environments, stages of  
356 development or upon introduction of a perturbation.



357 Differences in the microbial community composition between both trout lines were less  
358 pronounced in the gills compared to the gut, although it should be noted that the sample  
359 size was smaller in this tissue due to difficulties amplifying the 16S rDNA region in  
360 certain samples. Nonetheless, alpha diversity metrics were similar in each line.  
361 Interestingly, *Candidatus Branchiomonas* was the dominant taxon in both lines. This is a  
362 known pathogen that has been shown to cause gill epitheliocystis in Atlantic salmon (53),  
363 although it has not been previously described in rainbow trout. Fish from both lines were  
364 visually healthy, suggesting that *Candidatus Branchiomonas* may be a common member  
365 of the trout gill microbiome in certain environments. Further studies should evaluate  
366 which factors favor the colonization of *Candidatus Branchiomonas* in trout gills.

367 *Flavobacterium sp.* was identified in the gills of both lines, although sequence search  
368 using BLAST did not yield species level taxonomic resolution. Although this taxon was  
369 present at low abundance in both lines, it was surprising that we detected higher  
370 *Flavobacterium sp.* abundance in the gill microbiome of the resistant line compared to  
371 the susceptible line. Considering that the resistant and susceptible lines maintained the  
372 survival phenotype following the challenge experiment, our results indicate that  
373 susceptibility to *F. psychrophilum* infection is not due to increased abundance of this  
374 pathogen as a member of the indigenous microbial community. Disease susceptibility  
375 may be instead due to the greater ability of this pathogen to displace the microbial  
376 communities in the susceptible line compared to the resistant line.

377 One of the interesting aspects of the present study was the identification of differences in  
378 the microbial composition between tanks of the same trout genetic lines. All tanks were  
379 supplied water from the same source, and proper water quality was maintained

380 throughout the experiment. This tank effect complicates the ability to discern between  
381 genetic lines, although there still appears to be notable differences when comparing each  
382 line, particularly in the gut as discussed earlier. There were similarities between two of  
383 the neighboring tanks that housed different lines, in tanks 11 and 12. However, this did  
384 not occur in the other two neighboring tanks, as the susceptible trout from tank 26  
385 displayed an expansion of pathogenic taxa compared to tank 25, which housed resistant  
386 trout. Work in zebrafish has shown that interhost dispersal can actually outweigh genetic  
387 factors that contribute to microbiome assembly (54). In order to assess whether host  
388 genetics contribute to host microbiome assembly, all external factors that potentially  
389 contribute to this network must also be accounted for. In the present study, diet was  
390 consistent across fish of all tanks, and environmental factors such as water quality and  
391 temperature were also consistently maintained. Still, differences amongst tanks were  
392 present that add noise to the between-group comparisons. This finding highlights the  
393 importance of adequate experimental design in fish microbiome studies as well as the fact  
394 that different factors differentially shape microbial assembly at different tissue sites (i.e.  
395 gut versus gills).

396

### 397 **Conclusions**

398 In conclusion, the present study reveals differences in the microbial composition of the  
399 gut but not the gills of two rainbow trout lines with differential susceptibility to *F.*  
400 *psychrophilum* infection. Disease susceptibility was associated with a more diverse gut  
401 microbiome and the presence of potentially pathogenic taxa although important tank  
402 effects were also detected. Thus, selective breeding programs may not only select for host

403 genetic factors but also, as a consequence, unique microbial assemblies, which in turn,  
404 may render the host more or less resilient to pathogen invasion or infection.

405

406 **Acknowledgements**

407 We thank Kurt Schwalm and Dr. Darrell Dinwiddie for handling the Illumina MiSeq  
408 runs. We thank Dr. Timothy Leeds for breeding the ARS-Fp-R and ARS-Fp-S genetic  
409 lines and Travis Moreland for fish rearing and Jeremy Everson for assistance with fish  
410 sampling. This work was supported in part by Agricultural Research Service Project  
411 1930-32000-006. Mention of trade names or commercial products in this publication is  
412 solely for the purpose of providing specific information and does not imply  
413 recommendation or endorsement by the U.S Department of Agriculture. USDA is an  
414 equal opportunity employer. Ryan Brown received funding by the UNM PREP program.

415

416

417

418

419

420

421

422

423

424

425

426

427

428

429 **References**

- 430 1. Thaiss CA, Zmora N, Levy M, Elinav E. The microbiome and innate immunity.  
431 Vol. 535, Nature. 2016. p. 65–74.
- 432 2. Shi N, Li N, Duan X, Niu H. Interaction between the gut microbiome and  
433 mucosal immune system. Vol. 4, Military Medical Research. 2017.
- 434 3. Buffie CG, Pamer EG. Microbiota-mediated colonization resistance against  
435 intestinal pathogens. Vol. 13, Nature Reviews Immunology. 2013. p. 790–801.
- 436 4. Bonder MJ, Kurilshikov A, Tigchelaar EF, Mujagic Z, Imhann F, Vila AV, et al.  
437 The effect of host genetics on the gut microbiome. Nat Genet.  
438 2016;48(11):1407–12.
- 439 5. Spor A, Koren O, Ley R. Unravelling the effects of the environment and host  
440 genotype on the gut microbiome. Nat Rev Microbiol. 2011;9(4):279–90.
- 441 6. Fulde M, Sommer F, Chassaing B, van Vorst K, Dupont A, Hensel M, et al.  
442 Neonatal selection by Toll-like receptor 5 influences long-term gut microbiota  
443 composition. Nature [Internet]. 2018;560(7719):489–93. Available from:  
444 <https://doi.org/10.1038/s41586-018-0395-5>
- 445 7. David LA, Maurice CF, Carmody RN, Gootenberg DB, Button JE, Wolfe BE, et al.  
446 Diet rapidly and reproducibly alters the human gut microbiome. Nature.  
447 2014;505(7484):559–63.
- 448 8. Rothschild D, Weissbrod O, Barkan E, Kurilshikov A, Korem T, Zeevi D, et al.

- 449 Environment dominates over host genetics in shaping human gut microbiota.  
450 Nature. 2018;555(7695):210–5.
- 451 9. Singh RK, Chang H-W, Yan D, Lee KM, Ucmak D, Wong K, et al. Influence of diet  
452 on the gut microbiome and implications for human health. J Transl Med  
453 [Internet]. 2017;15(1):73. Available from: [http://translational-](http://translational-medicine.biomedcentral.com/articles/10.1186/s12967-017-1175-y)  
454 [medicine.biomedcentral.com/articles/10.1186/s12967-017-1175-y](http://translational-medicine.biomedcentral.com/articles/10.1186/s12967-017-1175-y)
- 455 10. Schreiner, Andrew B., John Y. Kao and VBY. The gut microbiome in health and  
456 in disease. Curr Opin Gastroenterol. 2015;31(1):69–75.
- 457 11. Nematollahi A, Decostere A, Pasmans F, Haesebrouck F. Flavobacterium  
458 psychrophilum infections in salmonid fish. Vol. 26, Journal of Fish Diseases.  
459 2003. p. 563–74.
- 460 12. Starliper CE. Bacterial coldwater disease of fishes caused by Flavobacterium  
461 psychrophilum. Vol. 2, Journal of Advanced Research. 2011. p. 97–108.
- 462 13. Bruun MS, Schmidt AS, Madsen L, Dalsgaard I. Antimicrobial resistance  
463 patterns in Danish isolates of Flavobacterium psychrophilum. Aquaculture.  
464 2000;187(3–4):201–12.
- 465 14. Bruun MS, Madsen L, Dalsgaard I. Efficiency of oxytetracycline treatment in  
466 rainbow trout experimentally infected with Flavobacterium psychrophilum  
467 strains having different in vitro antibiotic susceptibilities. Aquaculture.  
468 2003;215(1–4):11–20.
- 469 15. Kum C, Kirkan S, Sekkin S, Akar F, Boyacioglu M. Comparison of in vitro  
470 antimicrobial susceptibility in Flavobacterium psychrophilum isolated from  
471 rainbow trout fry. J Aquat Anim Health [Internet]. 2008;20(4):245–51.

- 472 Available from: <http://www.scopus.com/inward/record.url?eid=2-s2.0->  
473 [60849126990&partnerID=40&md5=5fd56d06af7153d9dcd51d16a9badb9e](http://www.scopus.com/inward/record.url?eid=2-s2.0-60849126990&partnerID=40&md5=5fd56d06af7153d9dcd51d16a9badb9e)
- 474 16. Silverstein JT, Vallejo RL, Palti Y, Leeds TD, Rexroad CE, Welch TJ, et al.  
475 Rainbow trout resistance to bacterial cold-water disease is moderately  
476 heritable and is not adversely correlated with growth. *J Anim Sci.*  
477 2009;87(3):860–7.
- 478 17. Wiens GD, LaPatra SE, Welch TJ, Evenhuis JP, Rexroad CE, Leeds TD. On-farm  
479 performance of rainbow trout (*Oncorhynchus mykiss*) selectively bred for  
480 resistance to bacterial cold water disease: Effect of rearing environment on  
481 survival phenotype. *Aquaculture.* 2013;388–391(1):128–36.
- 482 18. Wiens GD, Palti Y, Leeds TD. Three generations of selective breeding  
483 improved rainbow trout (*Oncorhynchus mykiss*) disease resistance against  
484 natural challenge with *Flavobacterium psychrophilum* during early life-stage  
485 rearing. *Aquaculture.* 2018;497:414–21.
- 486 19. Hadidi S, Glenney GW, Welch TJ, Silverstein JT, Wiens GD. Spleen Size Predicts  
487 Resistance of Rainbow Trout to *Flavobacterium psychrophilum* Challenge. *J*  
488 *Immunol* [Internet]. 2008;180(6):4156–65. Available from:  
489 <http://www.jimmunol.org/cgi/doi/10.4049/jimmunol.180.6.4156>
- 490 20. Marancik D, Gao G, Paneru B, Ma H, Hernandez AG, Salem M, et al. Whole-body  
491 transcriptome of selectively bred, resistant-, control-, and susceptible-line  
492 rainbow trout following experimental challenge with *Flavobacterium*  
493 *psychrophilum*. *Front Genet.* 2015;5(JAN).
- 494 21. Mitchell KR, Takacs-Vesbach CD. A comparison of methods for total

- 495 community DNA preservation and extraction from various thermal  
496 environments. *J Ind Microbiol Biotechnol.* 2008;35(10):1139–47.
- 497 22. Caporaso JG, Kuczynski J, Stombaugh J, Bittinger K, Bushman FD, Costello EK,  
498 et al. QIIME allows analysis of high-throughput community sequencing data.  
499 Vol. 7, *Nature Methods.* 2010. p. 335–6.
- 500 23. Callahan BJ, McMurdie PJ, Rosen MJ, Han AW, Johnson AJA, Holmes SP.  
501 DADA2: High-resolution sample inference from Illumina amplicon data. *Nat*  
502 *Methods.* 2016;13(7):581–3.
- 503 24. Team RC. R: A language and environment for statistical computing [Internet].  
504 Vienna, Austria; 2018. Available from: <https://www.r-project.org/>
- 505 25. McMurdie PJ, Holmes S. Phyloseq: An R Package for Reproducible Interactive  
506 Analysis and Graphics of Microbiome Census Data. *PLoS One.* 2013;8(4).
- 507 26. Mandal S, Van Treuren W, White RA, Eggesbø M, Knight R, Peddada SD.  
508 Analysis of composition of microbiomes: a novel method for studying  
509 microbial composition. *Microb Ecol Health Dis* [Internet]. 2015;26:27663.  
510 Available from:  
511 <http://www.ncbi.nlm.nih.gov/pubmed/26028277>  
512 <http://www.pubmedcentral.nih.gov/articlerender.fcgi?artid=PMC4450248>
- 513 27. Love MI, Huber W, Anders S. Moderated estimation of fold change and  
514 dispersion for RNA-seq data with DESeq2. *Genome Biol.* 2014;15(12).
- 515 28. Anderson MJ. PERMANOVA Permutational multivariate analysis of variance.  
516 *Austral Ecol* [Internet]. 2005;1–24. Available from:  
517 <http://www.stat.auckland.ac.nz/~mja>  
<http://www.stat.auckland.ac.nz/>

- 518 ~mja/prog/PERMANOVA\_UserNotes.pdf
- 519 29. McMurdie PJ, Holmes S. Waste Not, Want Not: Why Rarefying Microbiome  
520 Data Is Inadmissible. *PLoS Comput Biol.* 2014;10(4).
- 521 30. Weiss S, Xu ZZ, Peddada S, Amir A, Bittinger K, Gonzalez A, et al.  
522 Normalization and microbial differential abundance strategies depend upon  
523 data characteristics. *Microbiome.* 2017;5(1).
- 524 31. Liaw a, Wiener M. Classification and Regression by randomForest. *R news.*  
525 2002;2(December):18–22.
- 526 32. Zhao L, Wang G, Siegel P, He C, Wang H, Zhao W, et al. Quantitative genetic  
527 background of the host influences gut microbiomes in chickens. *Sci Rep.*  
528 2013;3.
- 529 33. Chaston JM, Dobson AJ, Newell PD, Douglas AE. Host genetic control of the  
530 microbiota mediates the *Drosophila* nutritional phenotype. *Appl Environ*  
531 *Microbiol.* 2016;82(2):671–9.
- 532 34. Kelly C, Salinas I. Under pressure: Interactions between commensal  
533 microbiota and the teleost immune system. Vol. 8, *Frontiers in Immunology.*  
534 2017.
- 535 35. Smith P, Willemsen D, Popkes M, Metge F, Gandiwa E, Reichard M, et al.  
536 Regulation of life span by the gut microbiota in the short-lived african  
537 turquoise killifish. *Elife.* 2017;6.
- 538 36. Lowrey L, Woodhams DC, Tacchi L, Salinas I. Topographical mapping of the  
539 rainbow trout (*Oncorhynchus mykiss*) microbiome reveals a diverse bacterial  
540 community with antifungal properties in the skin. *Appl Environ Microbiol.*



- 541 2015;81(19):6915–25.
- 542 37. Reid HI, Treasurer JW, Adam B, Birkbeck TH. Analysis of bacterial populations  
543 in the gut of developing cod larvae and identification of *Vibrio logei*, *Vibrio*  
544 *anguillarum* and *Vibrio splendidus* as pathogens of cod larvae. *Aquaculture*.  
545 2009;288(1–2):36–43.
- 546 38. Miyake S, Ngugi DK, Stingl U. Diet strongly influences the gut microbiota of  
547 surgeonfishes. *Mol Ecol*. 2015;24(3):656–72.
- 548 39. Neuman C, Hatje E, Zarkasi KZ, Smullen R, Bowman JP, Katouli M. The effect of  
549 diet and environmental temperature on the faecal microbiota of farmed  
550 Tasmanian Atlantic Salmon (*Salmo salar* L.). *Aquac Res*. 2016;47(2):660–72.
- 551 40. Tacchi L, Lowrey L, Musharrafieh R, Crossey K, Larragoite ET, Salinas I. Effects  
552 of transportation stress and addition of salt to transport water on the skin  
553 mucosal homeostasis of rainbow trout (*Oncorhynchus mykiss*). *Aquaculture*.  
554 2015;435:120–7.
- 555 41. Llewellyn MS, Leadbeater S, Garcia C, Sylvain FE, Custodio M, Ang KP, et al.  
556 Parasitism perturbs the mucosal microbiome of Atlantic Salmon. *Sci Rep*.  
557 2017;7.
- 558 42. Boutin S, Sauvage C, Bernatchez L, Audet C, Derome N. Inter individual  
559 variations of the fish skin microbiota: Host genetics basis of mutualism? *PLoS*  
560 *One*. 2014;9(7).
- 561 43. Uren Webster TM, Consuegra S, Hitchings M, Garcia de Leaniz C. Inter-  
562 population variation in the Atlantic salmon microbiome reflects  
563 environmental and genetic diversity. *Appl Environ Microbiol* [Internet].

- 564 2018;AEM.00691-18. Available from:  
565 <http://aem.asm.org/lookup/doi/10.1128/AEM.00691-18>
- 566 44. Dehler CE, Secombes CJ, Martin SAM. Seawater transfer alters the intestinal  
567 microbiota profiles of Atlantic salmon (*Salmo salar* L.). *Sci Rep.* 2017;7(1).
- 568 45. Llewellyn MS, McGinnity P, Dionne M, Letourneau J, Thonier F, Carvalho GR, et  
569 al. The biogeography of the atlantic salmon (*Salmo salar*) gut microbiome.  
570 *Isme J* [Internet]. 2015;10(5):1–5. Available from:  
571 <http://dx.doi.org/10.1038/ismej.2015.189>
- 572 46. Holben WE, Williams P, Saarinen M, S??rkilahti LK, Apajalahti JHA.  
573 Phylogenetic analysis of intestinal microflora indicates a novel *Mycoplasma*  
574 phylotype in farmed and wild salmon. *Microb Ecol.* 2002;44(2):175–85.
- 575 47. Lyons PP, Turnbull JF, Dawson KA, Crumlish M. Phylogenetic and functional  
576 characterization of the distal intestinal microbiome of rainbow trout  
577 *Oncorhynchus mykiss* from both farm and aquarium settings. *J Appl*  
578 *Microbiol.* 2017;122(2):347–63.
- 579 48. Ciric M, Waite D, Draper J, Jones JB. Characterisation of gut microbiota of  
580 farmed Chinook salmon using metabarcoding. *bioRxiv* [Internet].  
581 2018;288761. Available from:  
582 <https://www.biorxiv.org/content/early/2018/03/26/288761.full.pdf+html>
- 583 49. Defosse DL, Johnson RC, Paster BJ, Dewhirst FE, Fraser GJ. *Brevinema*  
584 *andersonii* gen. nov., sp. nov., an infectious spirochete isolated from the short-  
585 tailed shrew (*Blarina brevicauda*) and the white-footed mouse (*Peromyscus*  
586 *leucopus*). *Int J Syst Bacteriol* [Internet]. 1995;45(1):78–84. Available from:

- 587 <http://www.ncbi.nlm.nih.gov/pubmed/7857811>
- 588 50. Matsuyama T, Yasuie M, Fujiwara A, Nakamura Y, Takano T, Takeuchi T, et al.  
589 A Spirochaete is suggested as the causative agent of Akoya oyster disease by  
590 metagenomic analysis. PLoS One. 2017;12(8).
- 591 51. Halperin JJ. A Tale of Two Spirochetes: Lyme Disease and Syphilis. Vol. 28,  
592 Neurologic Clinics. 2010. p. 277–91.
- 593 52. Huys G, Cnockaert M, Abbott SL, Janda JM, Vandamme P. *Hafnia paralvei* sp.  
594 nov., formerly known as *Hafnia alvei* hybridization group 2. Int J Syst Evol  
595 Microbiol. 2010;60(8):1725–8.
- 596 53. Toenshoff ER, Kvellestad A, Mitchell SO, Steinum T, Falk K, Colquhoun DJ, et al.  
597 A novel betaproteobacterial agent of gill epitheliocystis in seawater farmed  
598 Atlantic salmon (*Salmo salar*). PLoS One. 2012;7(3).
- 599 54. Burns AR, Miller E, Agarwal M, Rolig AS, Milligan-Myhre K, Sereidick S, et al.  
600 Interhost dispersal alters microbiome assembly and can overwhelm host  
601 innate immunity in an experimental zebrafish model. Proc Natl Acad Sci  
602 [Internet]. 2017;201702511. Available from:  
603 <http://www.pnas.org/lookup/doi/10.1073/pnas.1702511114>  
604  
605  
606

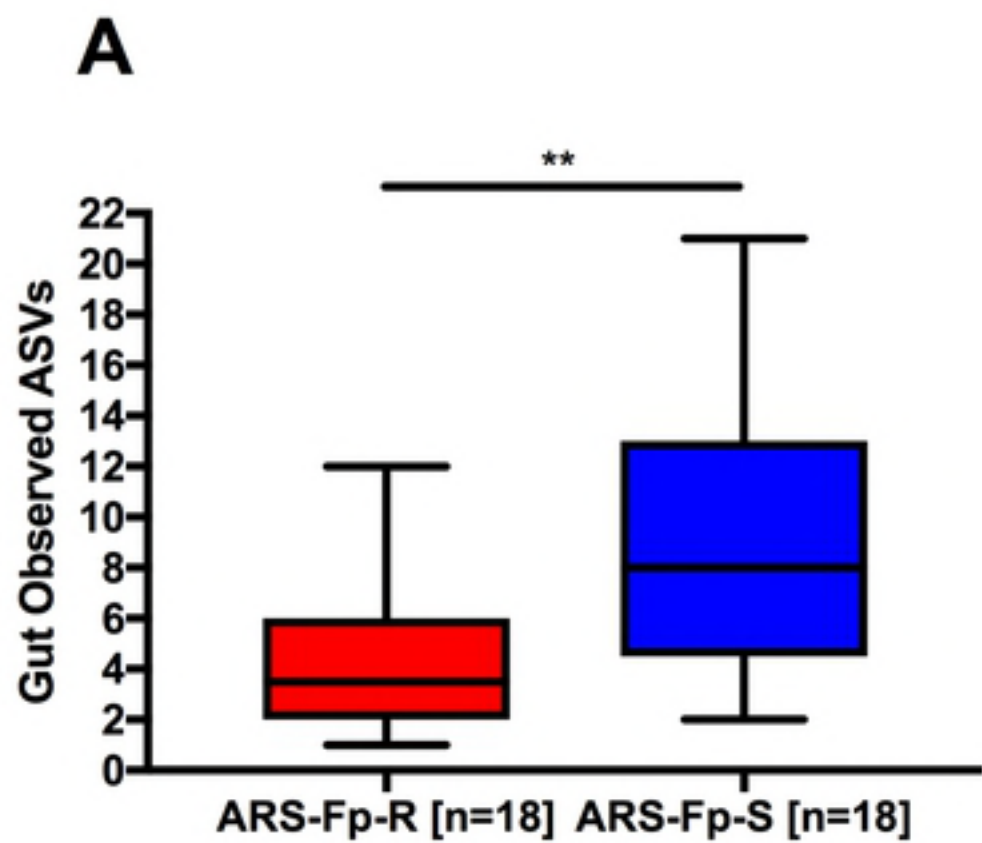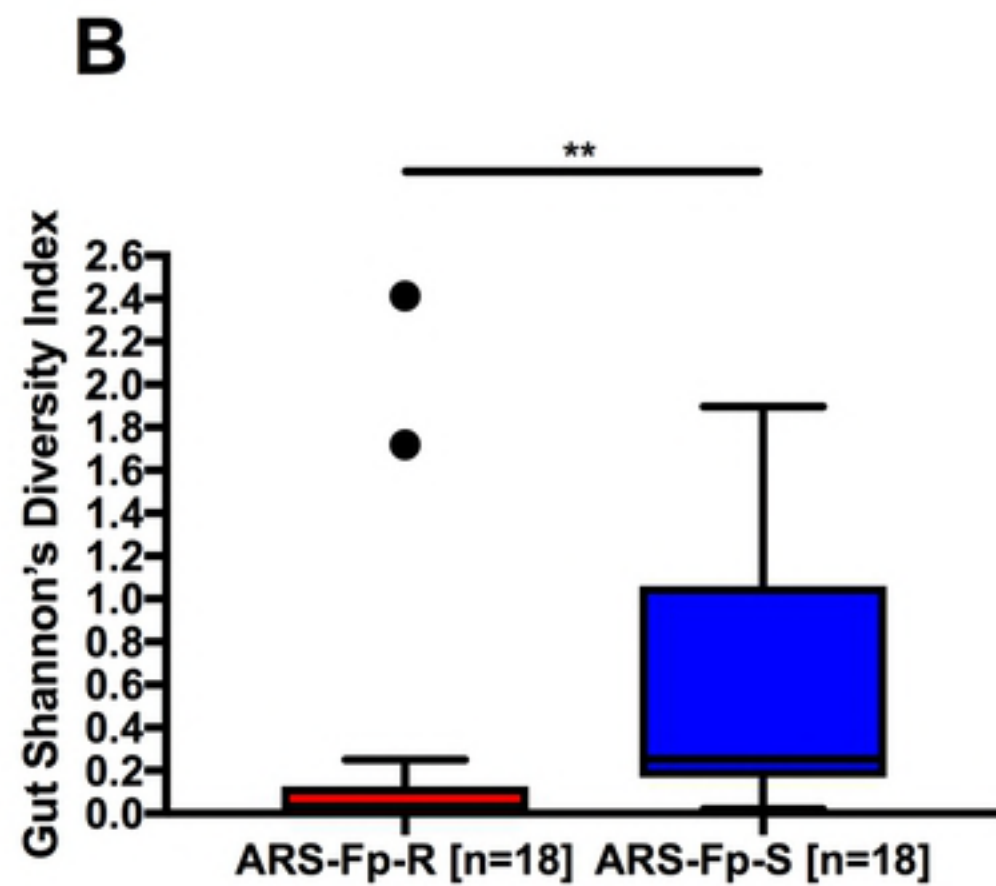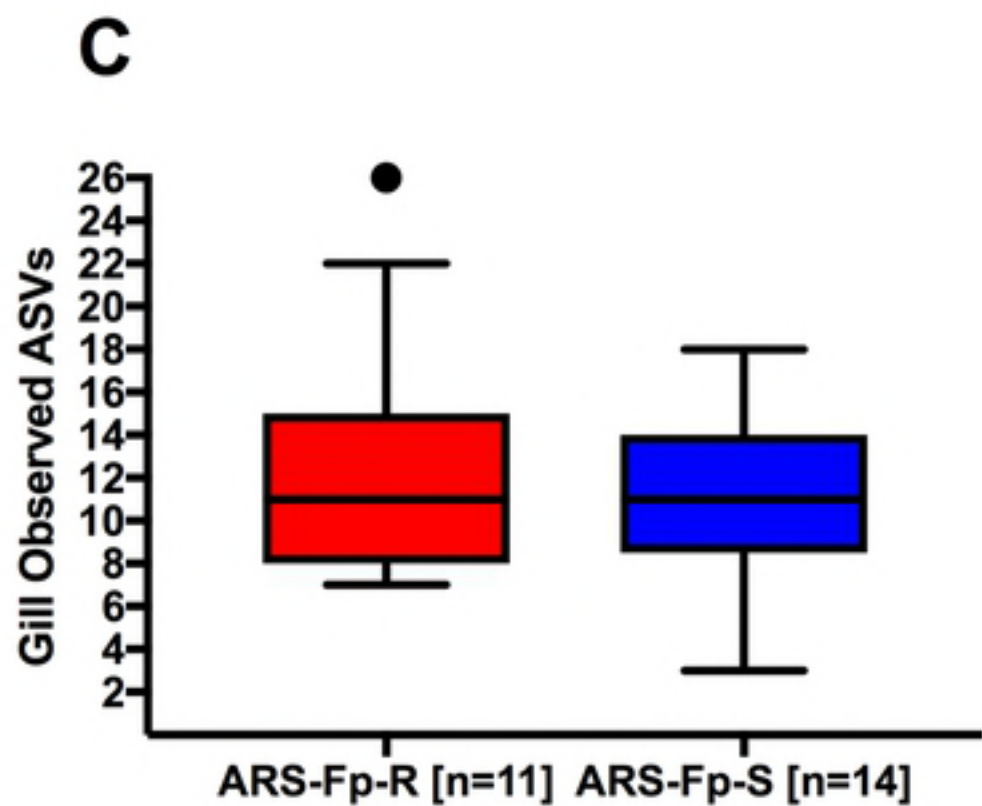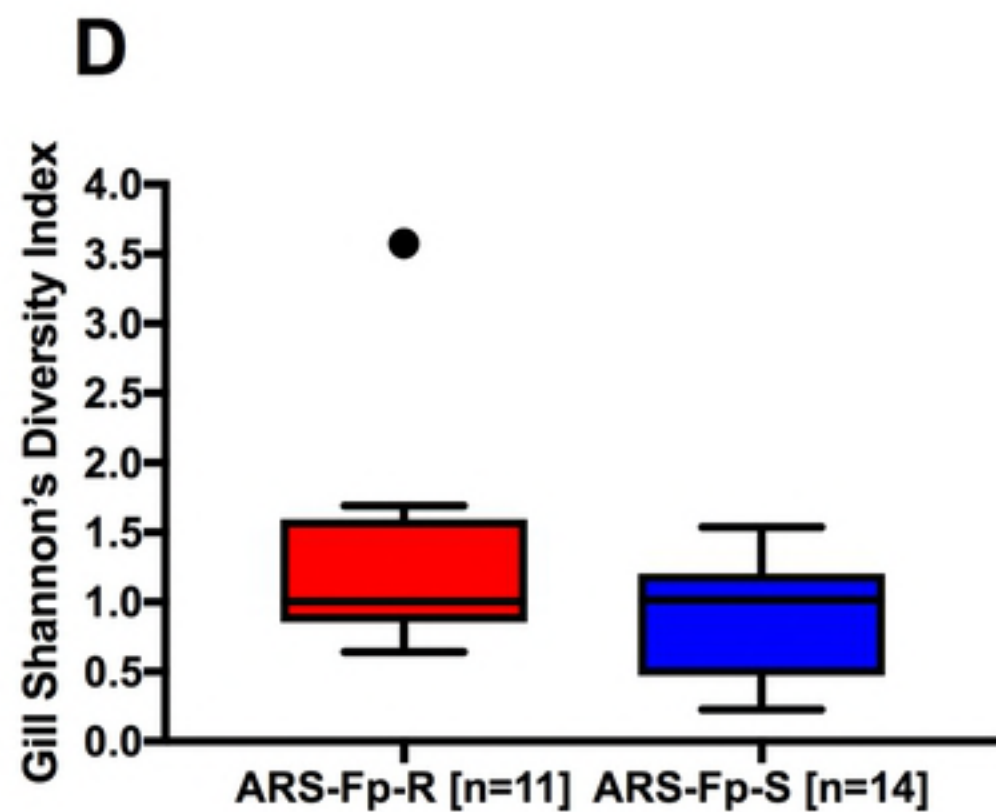

**A**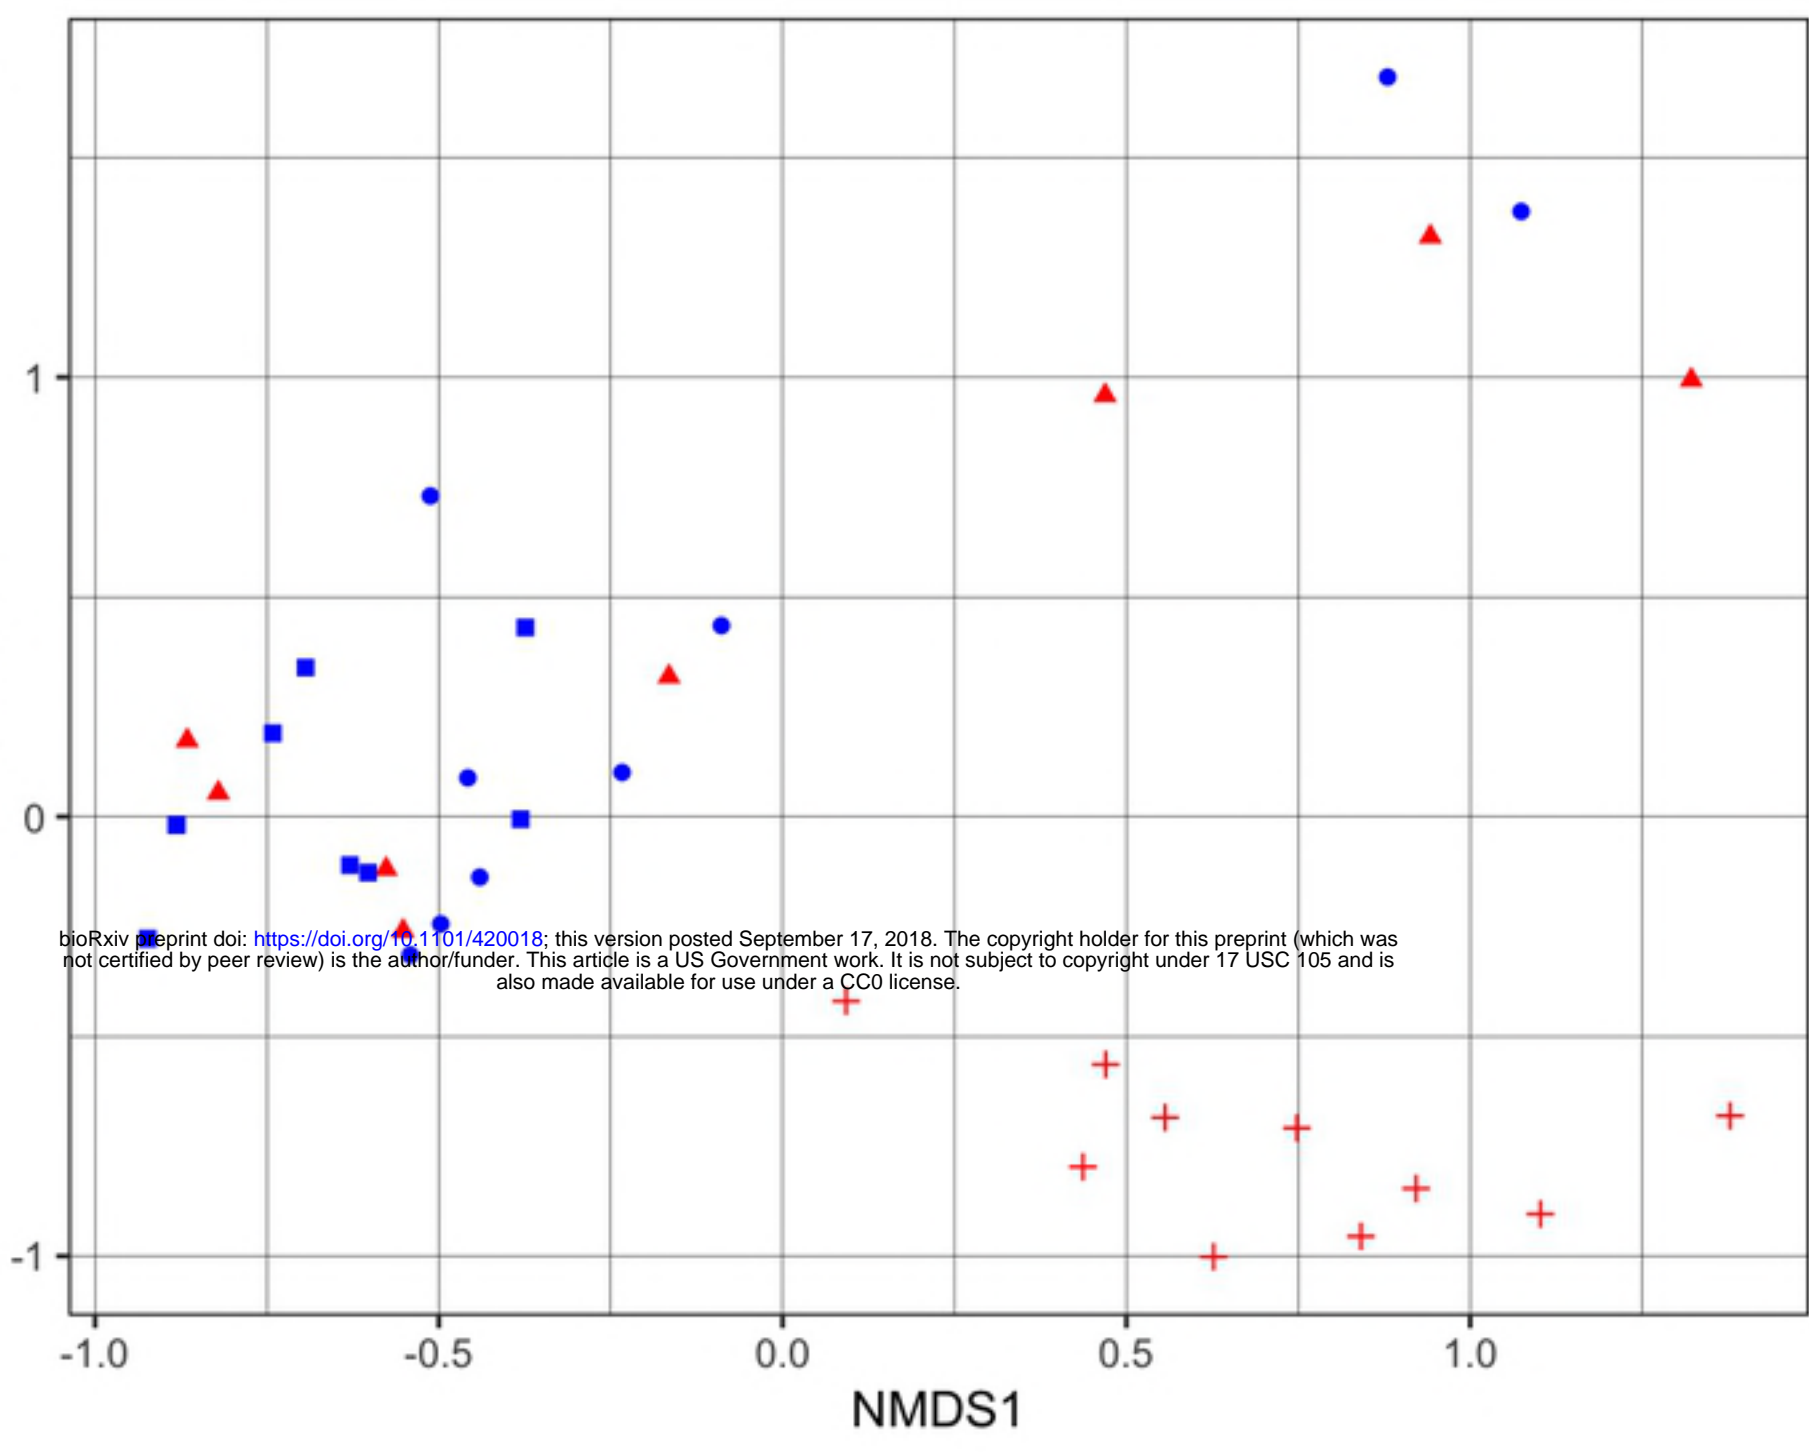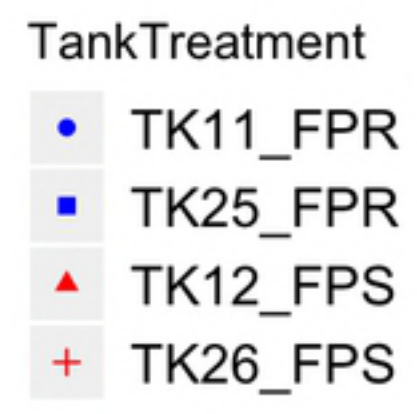**B**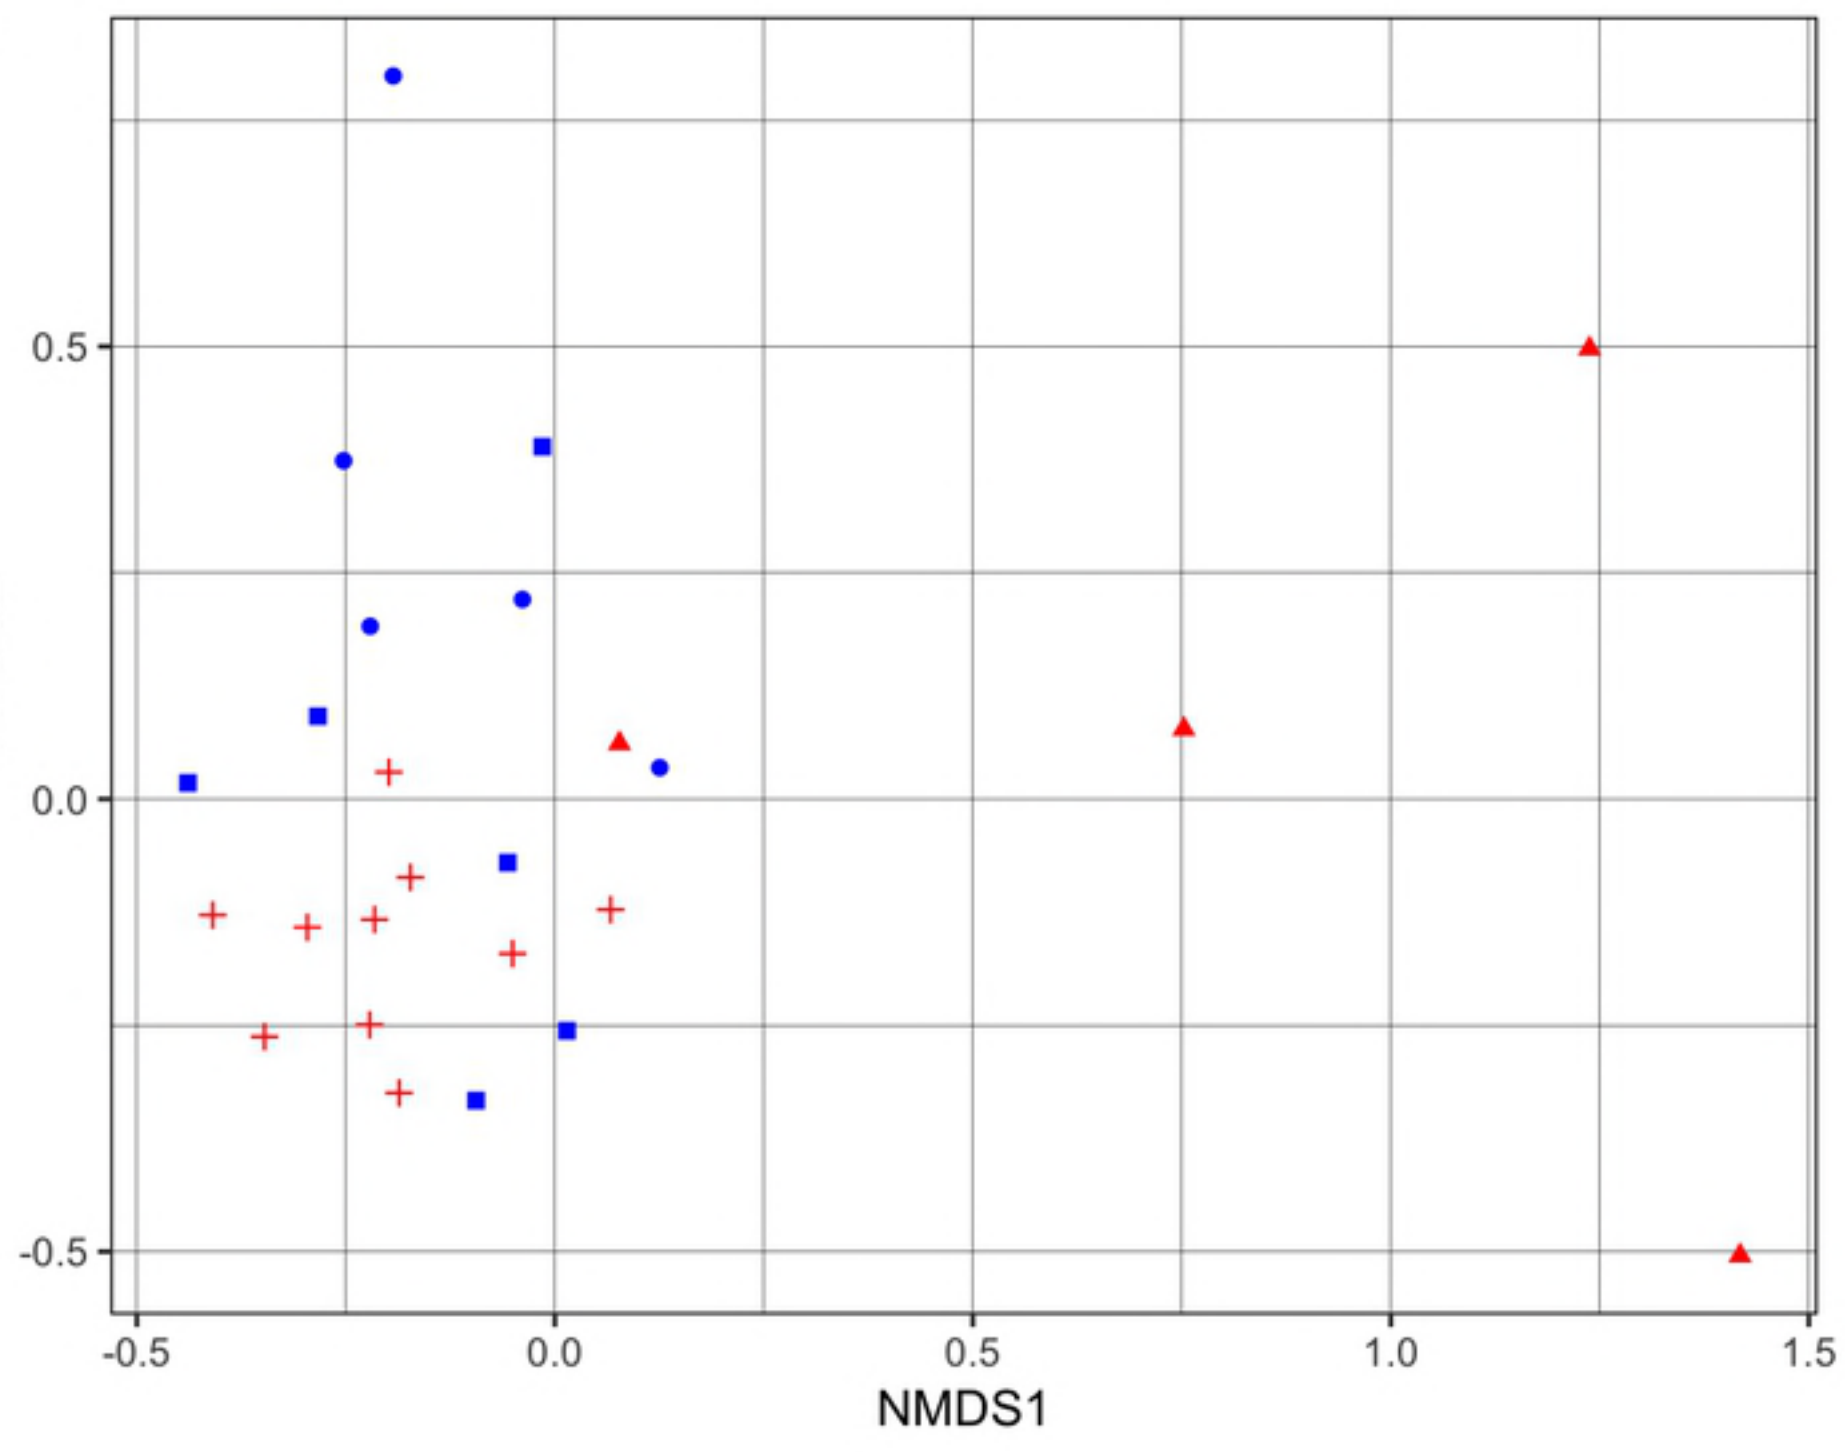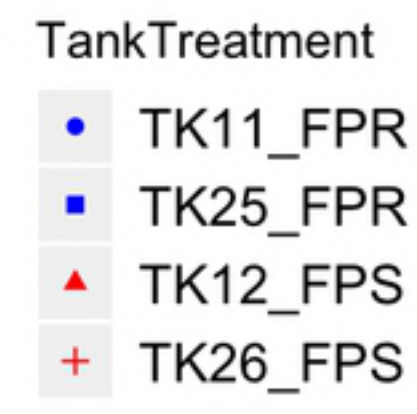

**A**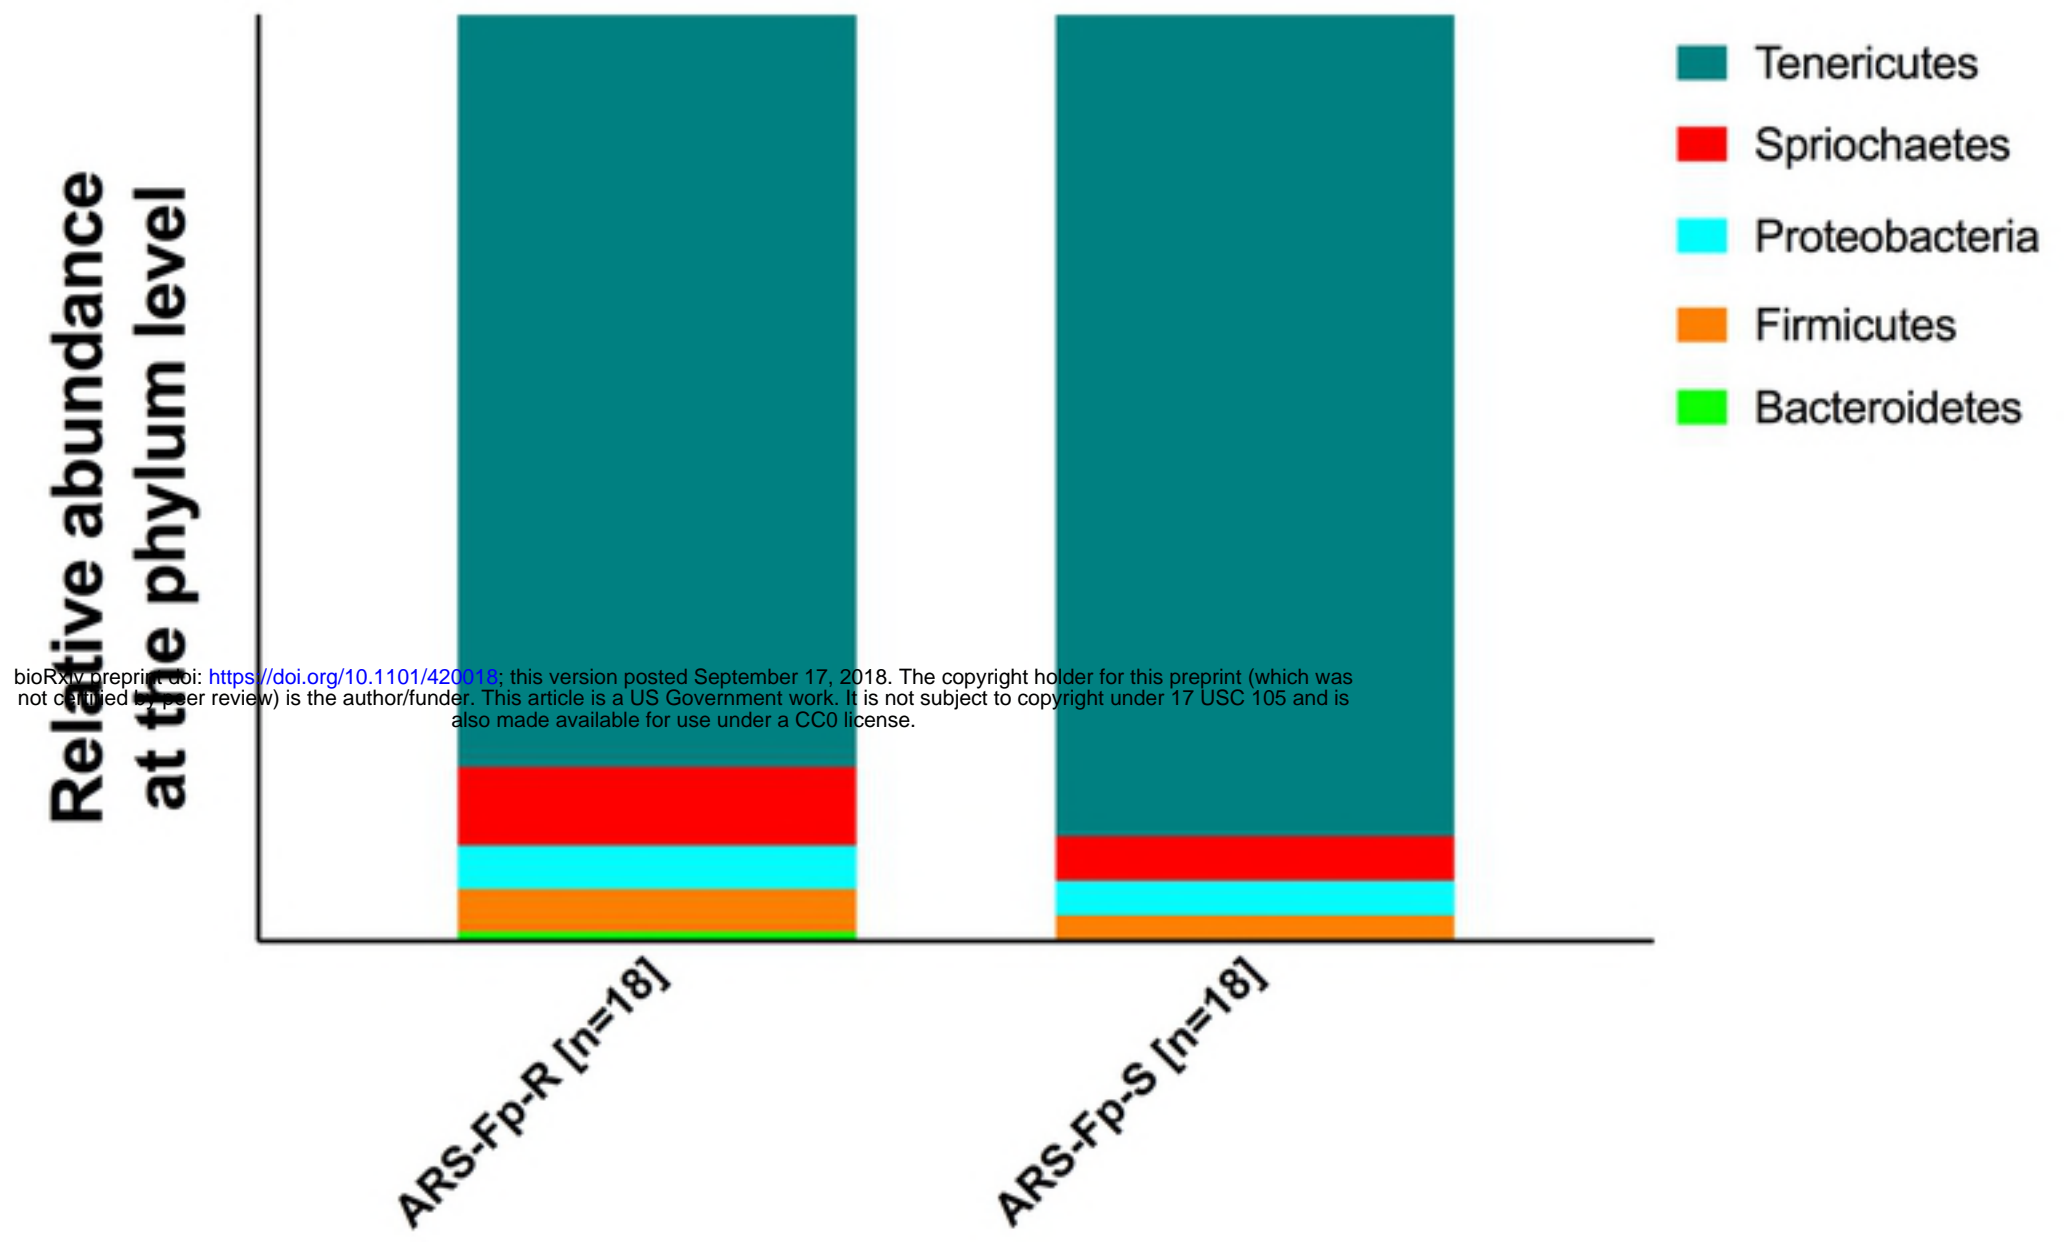**B**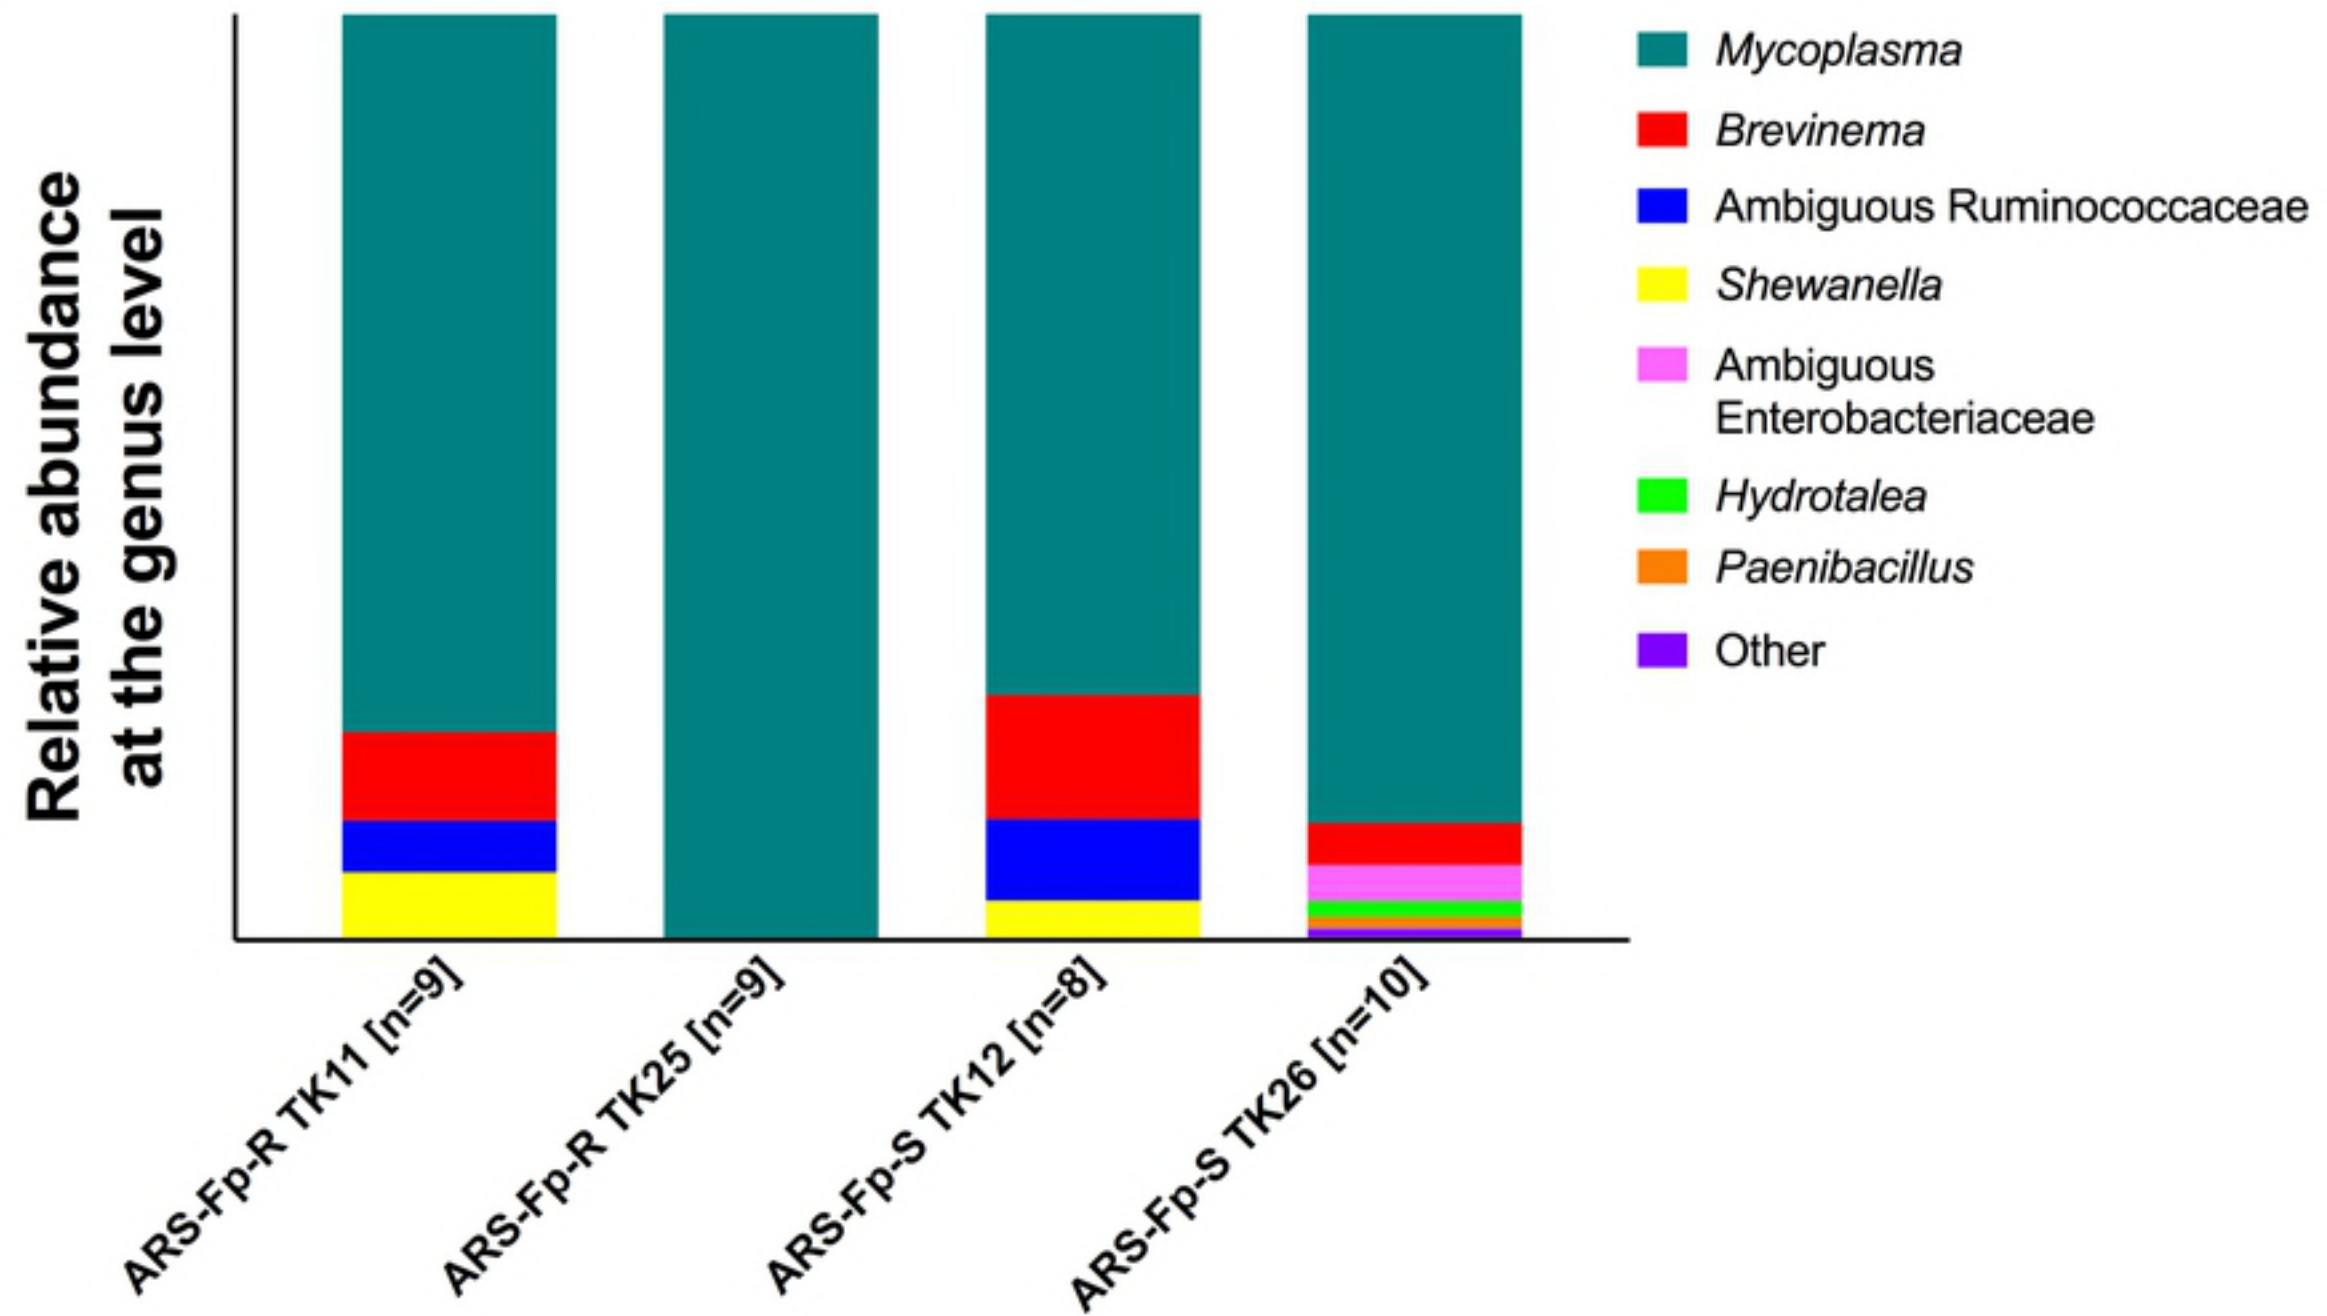











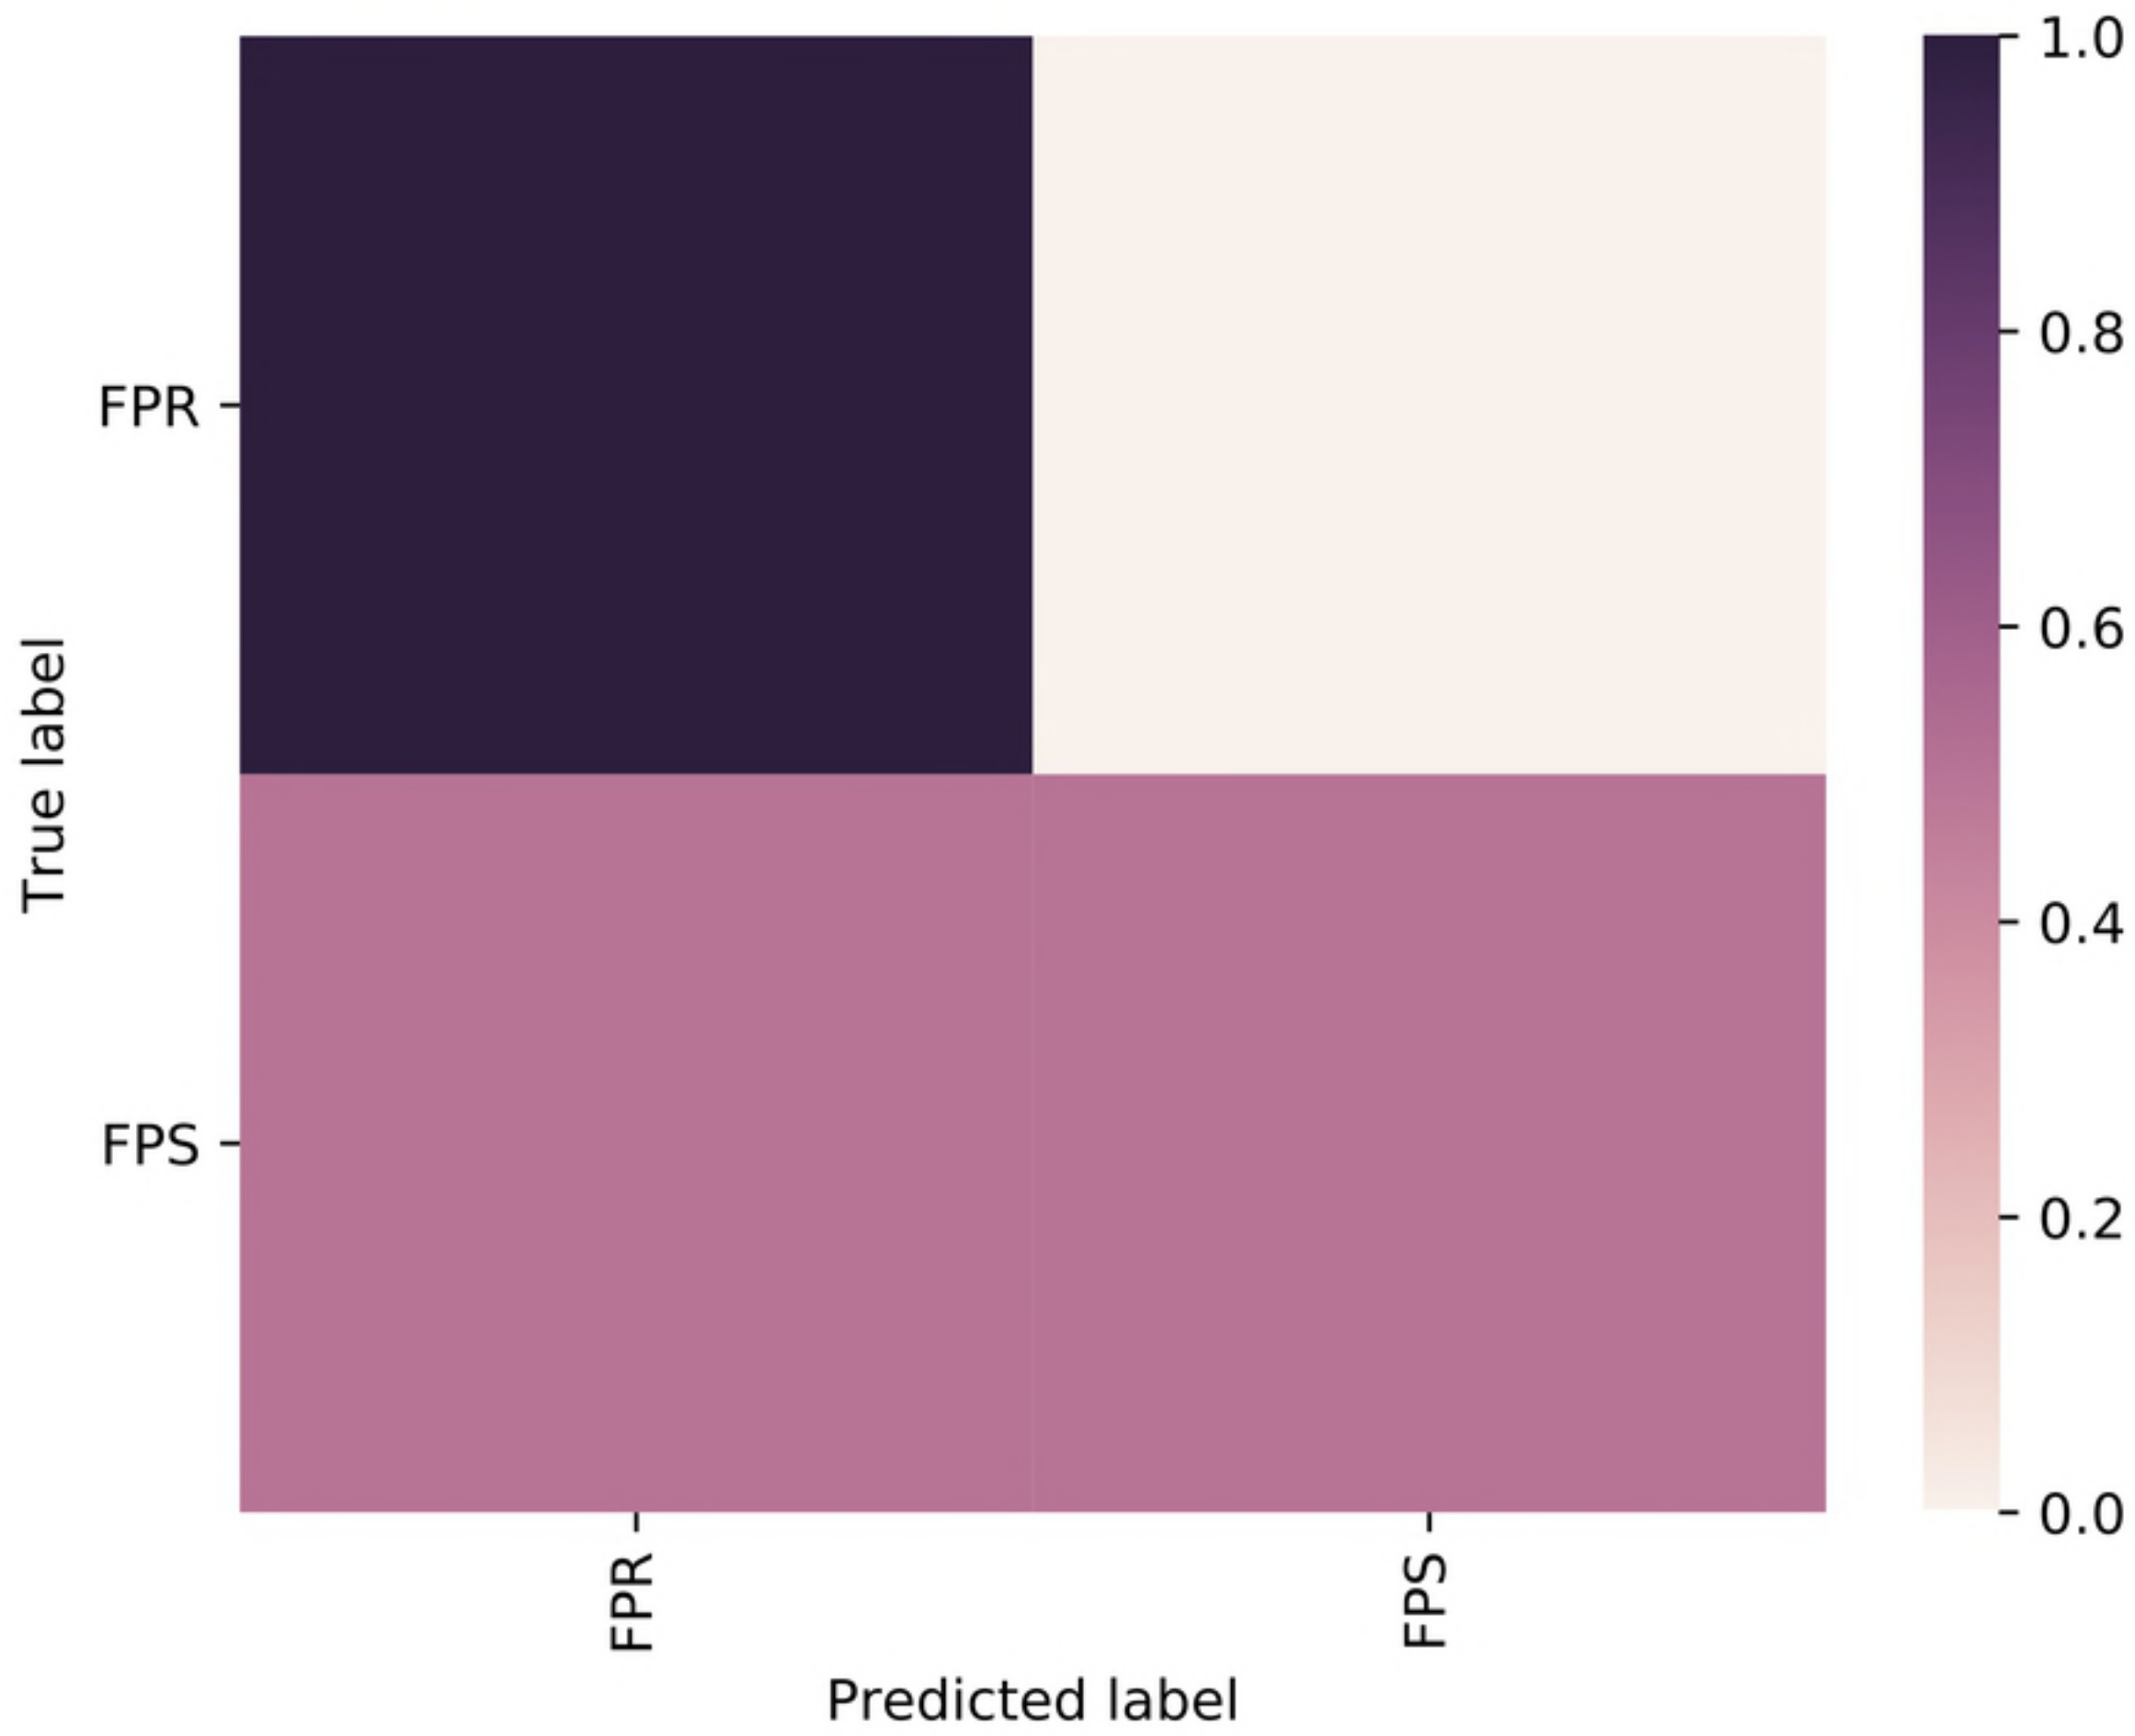

Source: http://biorxiv.org/content/10.1101/420018v1.full.pdf
